1           **Trophic eggs affect caste determination in the ant *Pogonomyrmex rugosus***

2                                           E. Genzoni<sup>1</sup>, T. Schwander<sup>1</sup> and L. Keller<sup>1</sup>

3           <sup>1</sup> Department of Ecology and Evolution, Biophore Building, University of Lausanne, 1015 Lausanne Switzerland

4           **Author contributions:** EG, TS and LK designed the study. EG performed the experiment and analysed the  
5           data. EG and LK wrote the manuscript with input from TS.

6           Abstract

7           Understanding how a single genome creates distinct phenotypes remains a fundamental challenge for biologists.  
8           Social insects provide a striking example of polyphenism, with queen and worker castes exhibiting morphological,  
9           behavioural, and reproductive differences. Here we show that trophic eggs, which do not contain an embryo and  
10          are primarily regarded as a source of food, play a role in the process of caste determination in the harvester ant  
11          *Pogonomyrmex rugosus*. When first instar larvae were given access to trophic eggs, they mostly developed into  
12          workers. By contrast, larvae without access to trophic eggs developed into queens. We found that trophic eggs  
13          differ in many ways from reproductive eggs, including texture, morphology and their contents of protein,  
14          triglycerides, glycogen, sugar and small RNAs. Moreover, comparison of miRNA fragment size distributions  
15          suggests differences in the composition of miRNAs between the two egg types. This is the first demonstration of  
16          trophic eggs playing a role in caste determination in social insects.

17          **Keyword:** Trophic eggs, *Pogonomyrmex rugosus* ant, caste determination, miRNA, triglycerides, glycogen,  
18          proteins

## 19 Introduction

20 Many species of insects, spiders, amphibians, marine invertebrates and sharks produce trophic eggs, a special  
21 type of eggs that do not contain an embryo (Levin and Bridges 1995; Blake and Arnofsky 1999; Collin 2004; Kudo  
22 and Nakahira 2004; Perry and Roitberg 2006; Strathmann and Strathmann 2006; Gibson *et al.* 2012; López-Ortega  
23 and Williams 2018). It is generally assumed that these non-developing eggs are either a by-product of failed  
24 reproduction or that they serve as nutrition for offspring (Perry and Roitberg 2006). However, the suggestion that  
25 trophic eggs solely provide a nutritional function is based on surprisingly little evidence. We here report a direct  
26 function of trophic eggs in the determination of alternative phenotypes in ants.

27 Trophic eggs have been reported in many ant species (Figure 1 and Supplementary Table 1), where they are also  
28 thought to mostly or only serve as food for the offspring (Crespi 1977). Although they are believed to be generally  
29 laid by workers, they can also be laid by the queens (see Figure 1 and Supplementary Table 1). While conducting  
30 egg cross fostering experiments in the ant *Pogonomyrmex rugosus* to study worker size variation, we observed a  
31 sudden increase in the frequency of females developing into queens. During these experiments, we only cross  
32 fostered reproductive eggs, raising the possibility that the absence of trophic eggs influenced the process of caste  
33 determination. Similarly, changes in the ratio of trophic and reproductive eggs has been proposed as a possible  
34 explanation for changes in worker size in another *Pogonomyrmex* species following treatments with a JH analogue  
35 (Helms Cahan *et al.* 2011). Because these treatments resulted in an increased proportion of trophic eggs, the  
36 authors proposed that the presence of trophic eggs might have altered the nutritional environment of developing  
37 larvae, thereby leading to increased worker size. These observations prompted us to investigate whether trophic  
38 eggs play a role in caste determination in *P. rugosus*. Our experiments show that the presence of trophic eggs  
39 reduces the probability that female larvae develop into reproductive individuals. Metabolomic analyses also  
40 revealed profound differences between reproductive and trophic eggs, including in the composition of miRNAs  
41 and content of protein, triglycerides, glycogen, and sugar.

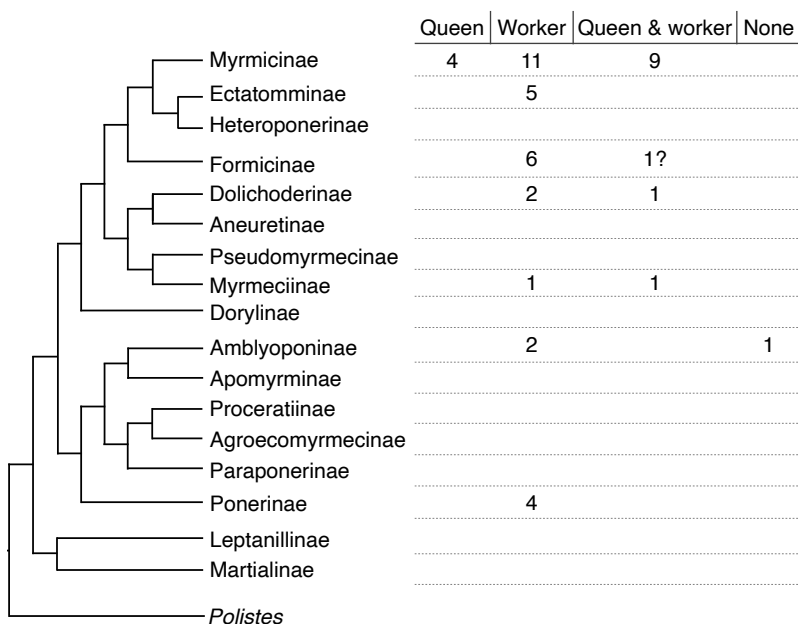

42

43 **Figure 1.** Trophic egg production is widespread in ants. Simplified phylogenetic tree of ant families redrawn after  
 44 Romiguier *et al.* (2022). The number of species with documented trophic egg production by queens, workers or both  
 45 castes, as well as absence of trophic eggs, is indicated for each family. Details on the species and related references  
 46 can be found in Supplementary Table 1.

47

## 48 Materials and methods

49 *Pogonomyrmex rugosus* colonies were initiated by queens collected after mating flights in 2008 (Bowie, Arizona,  
 50 USA) or 2013 (Bowie and Florence, Arizona, USA). The colonies were maintained at 28°C and 60% humidity, with  
 51 a 12-h/12-h light:dark cycle and fed once a week with grass seeds, flies and 20% honey water. Eggs were collected  
 52 in October 2020 for the experiment investigating the effect of trophic eggs on larval caste fate, in November 2021  
 53 for the percentage of trophic eggs and from February to December 2021 for the egg content analysis.

### 54 Trophic and reproductive egg production

55 To verify that workers do not lay trophic eggs, as previously shown for other *Pogonomyrmex* species  
 56 (Supplementary Table 1), we created 12 queenless colonies and waited approximately three weeks until workers  
 57 started laying eggs. From each of these colonies, we isolated two groups of five workers for 12 hours every two  
 58 days for two weeks in November 2020 to obtain eggs. Collected eggs were then placed for 10 days in a petri dish  
 59 containing a water reservoir to study their development and distinguish whether they were trophic or reproductive.

60 To determine whether queens lay variable percentages of trophic eggs over time, we isolated 43 *P. rugosus*  
 61 queens for 8 hours every day for 2 weeks, before and after hibernation, and counted the number of trophic and  
 62 reproductive eggs laid (see results for how to discriminate the two types of eggs). The percentage of trophic eggs  
 63 was compared using a linear mixed effect model within Rstudio (RStudio Team 2015), with before vs after  
 64 hibernation as the explanatory variable and colony as a random factor.

65 To inform on the mechanisms of oogenesis, we assessed whether reproductive and trophic eggs were laid in a  
66 random order, or whether eggs of a given type were laid in clusters. To this end, we isolated 11 queens for 10  
67 hours, eight times over three weeks, and collected every hour the eggs laid. To determine whether reproductive  
68 and trophic eggs were laid in a random order, we used Rstudio (package *snpar* v.1.0; RStudio Team 2015) to  
69 perform a Wald–Wolfowitz runs test for each queen’s egg laying sequence (this non-parametric test calculates the  
70 likelihood that a binomial data sequence is random).

#### 71 Trophic egg influence on the larval caste fate

72 To determine whether trophic eggs influence the process of caste determination, we compared the development  
73 of freshly hatched (first instar) larvae placed in small recipient colonies with and without trophic eggs. From each  
74 of 22 donor colonies, we obtained approximately 30 freshly hatched larvae by isolating the queens for 16 hours  
75 (from 2pm to 6am) every day for three weeks (in October 2020), with a 24-hour break every three days. Eggs were  
76 collected every eight hours and placed during 10 days in a petri-dish with a water reservoir ensuring a high humidity  
77 until they hatched. After hatching, half of the larvae were then transferred into a recipient colony containing 20  
78 workers, while the other half of the larvae were placed in identical recipient colonies, which received in addition  
79 three 0-4 hours-old trophic eggs. There was no cross-fostering between colonies, so that larvae were always  
80 placed in recipient colonies containing workers from the same donor colony. The recipient colonies were  
81 maintained at 28°C and 60% humidity, with a 12-h/12-h light:dark cycle and fed twice a week with grass seeds,  
82 flies and 20% honey water. The caste of each individual was recorded at the pupal stage. To compare the  
83 proportion of queen pupae produced between recipient colonies with and without trophic eggs, we used Rstudio  
84 (RStudio Team 2015) and the package *lme4* (Bates *et al.* 2015) to perform a binomial generalized linear mixed  
85 effects analysis (GLMM) fit by maximum likelihood, with caste as response variable (binary categorical factor) and  
86 presence/absence of trophic eggs as an explanatory variable. Donor colony was included as a random effect. To  
87 test whether the presence of trophic eggs affects survival, we performed a linear mixed effect analysis with  
88 mortality as a response variable, presence/absence of trophic eggs as explanatory variable, and colonies as  
89 random effects. As we found a significantly higher survival of larvae in recipient colonies with trophic eggs than  
90 recipient colonies without trophic eggs (see results), we tested whether the percentage of larvae developing into  
91 queens was correlated with survival by performing a linear mixed effects analysis with the percentage of queen  
92 pupae as response variable, the survival as an explanatory variable and colonies as a random factor.

#### 93 Volume and content of trophic and reproductive eggs

94 The volumes of trophic (n=11) and reproductive eggs (n=14) were estimated by using the volume of an ellipse  
95  $\left(\frac{4}{3} \times \pi \times \text{egg length} \times \left(\frac{\text{egg width}}{2}\right)^2\right)$ , with egg length and width estimated on images under 10x magnification using  
96 ZEN Microscopy Software (v. 1.1.2.0).

97 To determine the nutritional content of reproductive and trophic eggs, we quantified the proteins, triglycerides,  
98 glycogen, and glucose in both types of eggs. We also quantified long and small RNAs (including miRNAs) as these

99 compounds have been shown to be involved in caste determination in other eusocial species (Suzzoni *et al.* 1979;  
100 Schwander *et al.* 2008a; Helms Cahan *et al.* 2011; Cameron *et al.* 2013; Guo *et al.* 2013; Libbrecht *et al.* 2013;  
101 Søvik *et al.* 2015; Collins *et al.* 2017). To obtain the two types of eggs, we isolated 12 queens for 10 hours (7am  
102 to 5pm; from March to October 2021) in a dark petri-dish with three workers and a water supply. Eggs were  
103 collected every hour (so all eggs were a maximum of one hour old), and trophic and reproductive eggs were flash-  
104 frozen separately in liquid nitrogen. Twenty eggs were pooled for triglycerides-sugar-protein analyses and six eggs  
105 for RNA analyses. They were kept at -80°C until the extractions were performed. After the 10 hours of isolation,  
106 queens and workers were returned to their colony until the next isolation session. For each of the 12 colonies, we  
107 obtained two replicates of reproductive and trophic egg pools (i.e., 24 replicates in total).

108 Triglycerides, glycogen and glucose were quantified as described in Tennessen *et al.* (2014), and protein levels  
109 were measured using a Bradford assay (Bradford 1976). The 20 one-hour old eggs per sample were homogenized  
110 with beads in 200µl of PBS buffer in a Precellys Evolution tissue homogenizer coupled with a Cryolys Evolution  
111 (Bertin Technologies SAS).

112 For the Bradford assay, 10µl of the homogenate were put in a clear-bottom 96-well plate with 300µl of Coomassie  
113 Plus Reagent (Thermo Scientific: 23200) and incubated for 10 minutes at room temperature. Protein standard  
114 (Sigma: P5369) was used as standard (ranging from 0-0.5mg/ml) and protein absorbance was read at 595nm on  
115 a Hidex Sense Microplate Reader.

116 For the triglycerides assay, 90µl of homogenate were heat treated at 70°C for 10 minutes, then 40µl were mixed  
117 with 40µl of Triglyceride Reagent (Sigma: T2449) for digestion and 40µl were mixed with PBS buffer for free  
118 glycerol measurement. After 30 minutes incubation at 37°C, 30µl of each sample and standards were transferred  
119 to clear-bottom 96-well plate. 100µl of Free Glycerol Reagent (Sigma: F6428) was added to each sample, mixed  
120 well by pipetting, and incubated five minutes at 37°C. Glycerol standard solution (Sigma: G7793) was used as  
121 standard (ranging from 0-1.0mg/ml TAG) and absorbance was read at 540nm on a Hidex Sense Microplate  
122 Reader. The triglycerides concentration in each sample was determined by subtracting the absorbance of free  
123 glycerol in the corresponding sample.

124 Glucose and glycogen were quantified as in Tennessen *et al.* (2014). A 90µl aliquot was heat treated at 70°C for  
125 10min and then diluted 1:2 with PBS. The standard curves for glucose (Sigma, G6918) and glycogen (Sigma:  
126 G0885) were made by diluting stocks to 160µg/ml, making 1:1 serial dilution for 160, 80, 40, 20 and 10µg/ml. 40µl  
127 of each sample was pipetted in duplicates of a clear microplate, and 30µl of each glucose or glycogen standard  
128 was pipetted in duplicates. Amyloglucosidase enzyme (Sigma, A1602) was diluted 3µl into 2000µl of PBS, and  
129 40µl diluted enzyme was pipetted to the glycogen standards and to one well of the sample (for total glucose  
130 determination), 40µl PBS was pipetted to the glucose standards and to the other sample well (for free glucose  
131 determination). The plate was incubated at 37°C for 60 minutes. 30µl of each standard and samples (in duplicates)  
132 were transferred to a UV 96-well plate and 100µl Glucose Assay Reagent (G3293) was pipetted to each well. The  
133 plate was incubated at room temperature for 15 minutes and the absorbance was read at 340nm on a Hidex Sense

134 Microplate Reader. The glycogen concentration was quantified by subtracting the free glucose absorbance from  
135 the total glycogen + glucose absorbance.

136 Concentrations of each compound (protein, triglycerides, glycogen, and glucose) were compared between  
137 reproductive and trophic eggs with Rstudio (RStudio Team 2015) and the package *lme4* (Bates *et al.* 2015) using  
138 a linear mixed effects analysis (LMER), with the concentration as response variable and egg type as explanatory  
139 variable. Colony and extraction batch were added as random effects in the model.

#### 140 Total and small RNA, and DNA

141 RNA (>200 nt) and small RNA were isolated using the miRNeasy Mini Kit (Qiagen, cat. no. 217004) and RNeasy®  
142 MinElute® Cleanup Kit (Qiagen, cat. no. 74204), respectively, following manufacturer instructions. RNA (>200 nt)  
143 and small RNA concentrations were measured with a QuantiFluor® RNA System (Promega). RNA (>200 nt)  
144 integrity was examined with an Agilent Fragment Analyzer (at the Lausanne Genomic Technologies Facility)  
145 using a High Sensitivity Assay and small RNA were examined using the small RNA kit (at the Gene Expression  
146 Core Facility at EPFL).

147 The miRNA and RNA (>200nt) concentrations were compared between reproductive and trophic eggs with paired-  
148 t-tests in Rstudio (RStudio Team 2015; for each type of eggs we used the average of the two replicates per colony).  
149 We also compared the fragment size distributions from 18 to 24 nucleotides for miRNAs (Sohel 2016) with a Mantel  
150 test.

151 DNA was extracted from pools of six eggs using TRIzol (Life Technologies). DNA concentration was measured  
152 with a Nanodrop 3300 (ThermoFisher), and DNA integrity was examined with an Agilent Fragment Analyzer (at  
153 the Lausanne Genomic Technologies Facility) using a High Sensitivity Assay. DNA concentrations were compared  
154 between reproductive and trophic eggs using paired-t-tests (sample size is 5 for both types of eggs, each sample  
155 being a pool of 6 eggs).

## 156 Results

### 157 Trophic and reproductive egg characteristics

158 *P. rugosus* queens lay two types of eggs that are morphologically different. Reproductive eggs are white with a  
159 bright surface and have a distinct oval shape, a homogenous content as well as a solid chorion (Figure 2A), while  
160 trophic eggs are rounder, have a smooth surface and a granular looking content as well as a fragile chorion (Figure  
161 2D). Trophic eggs had a significantly larger volume ( $94.3 \pm 4.3 \text{ nL}$ ;  $n=11$ ) than reproductive eggs ( $n=14$ ;  $63.3 \pm 1.6 \text{ nL}$ ;  
162 two-sample t-test,  $t(23) = -9.54$ ,  $p = 1.8 \times 10^{-09}$ ). *P. rugosus* workers only laid reproductive eggs. They started to lay  
163 eggs approximately three weeks after queen removal ( $n=12$  queenless recipient colonies) and approximately 90%  
164 of the eggs successfully hatched. However, only approximately 5% successfully developed into pupae which were  
165 all males.

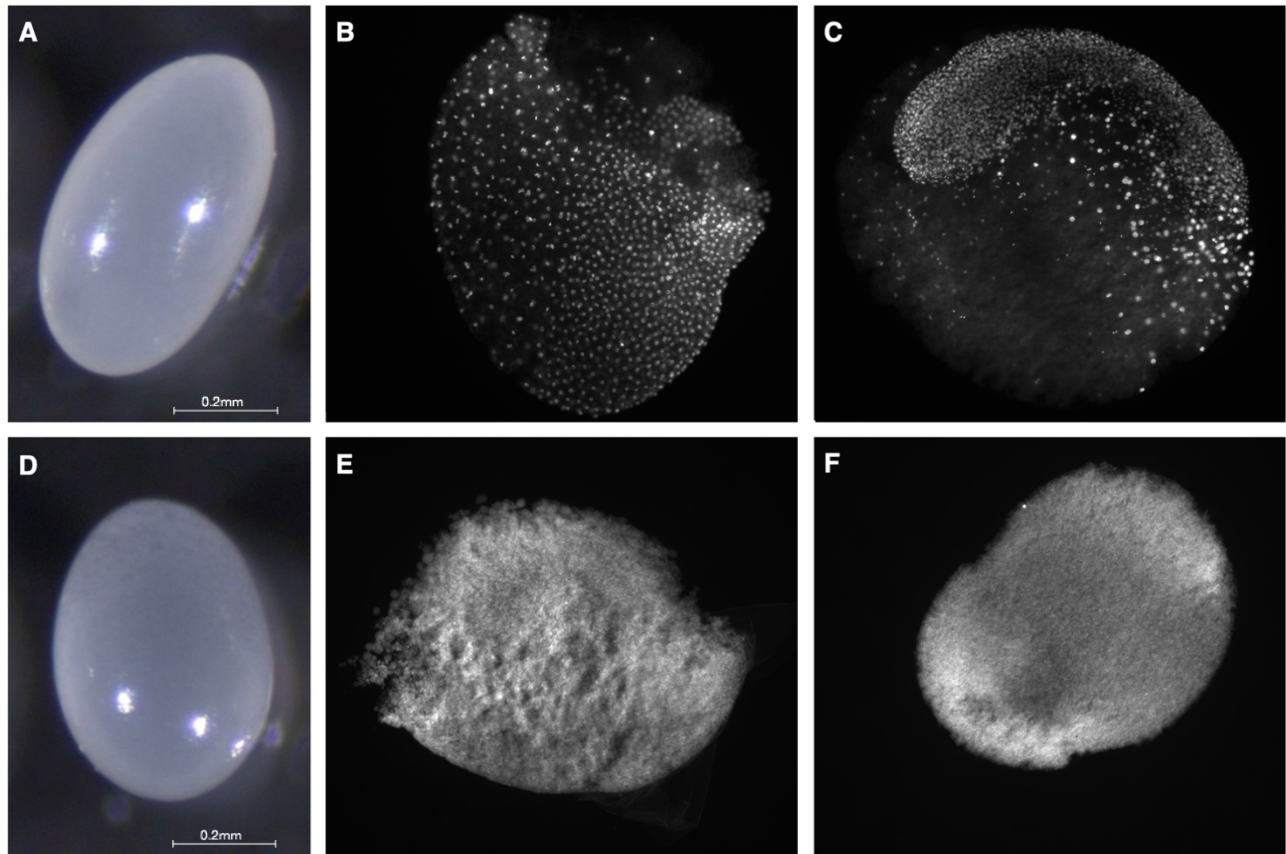

166

167 **Figure 2.** Morphology and development of eggs laid by *P. rugosus* queens. Reproductive egg general morphology (A),  
 168 with embryonic development at approximately 25 hours (B) and 65 hours (C). In trophic eggs (D), there is no embryonic  
 169 development at 25 hours (E) nor at 65 hours (F). Panels B, C, E, F represent fluorescence images with DAPI-  
 170 counterstained nuclei.

171 The percentage of eggs that were trophic was higher before hibernation ( $61.6 \pm 1.4\%$  mean  $\pm$  SE;  $n=43$  colonies)  
 172 than after ( $50.3 \pm 2.0\%$ ; LMER,  $t(86)=5.04$ ,  $p=9 \times 10^{-6}$ ). This higher percentage was due to a reduced number of  
 173 reproductive eggs, the number of trophic eggs laid remained stable. The production of the two types of eggs was  
 174 not random (Wald-Wolfowitz runs tests,  $p$ -values for the 11 queens in Table 1). Instead, each of the 11 queens  
 175 tended to lay relatively long sequences of either reproductive ( $6.1 \pm 0.7$ ; mean number per sequence  $\pm$  SE) or  
 176 trophic eggs ( $6.0 \pm 0.5$ ; Figure 3).

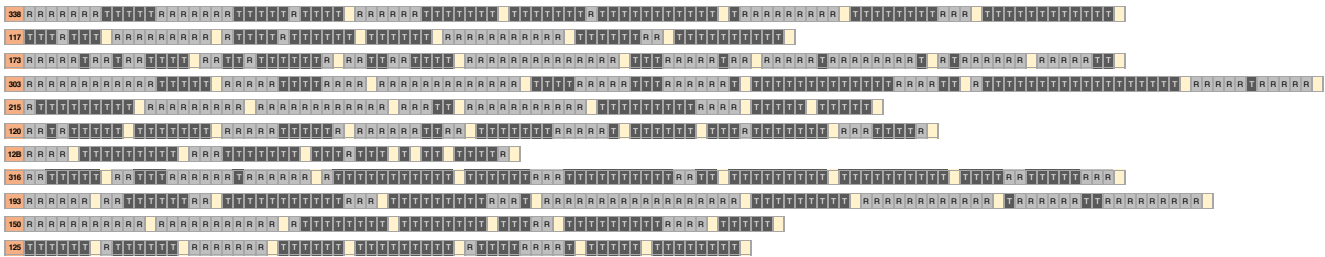

177

178 **Figure 3.** Egg laying sequences from eleven *P. rugosus* queens. Every row shows the sequence of reproductive R and  
 179 trophic T eggs laid by a given queen (queen ID in the orange cell). Each egg laying session lasted 10 hours. Each yellow  
 180 square separates two egg laying sessions and represents an interval of minimum 16 hours to several days.

181

182 **Table 1.** Wald-Wolfowitz runs tests on the queen's egg sequence. Significant p-values (corrected for multiple testing)  
183 indicate that queens do not lay reproductive and trophic eggs in a random sequence.

| Queen ID   | P-value for egg sequence | P-value of random sequence | Number of eggs per sequence |
|------------|--------------------------|----------------------------|-----------------------------|
| <b>338</b> | 4.1*10 <sup>-11</sup>    | 0.419                      | 94                          |
| <b>117</b> | 4.3*10 <sup>-07</sup>    | 0.567                      | 63                          |
| <b>173</b> | 1.7*10 <sup>-03</sup>    | 0.755                      | 92                          |
| <b>303</b> | 4.8*10 <sup>-13</sup>    | 0.765                      | 110                         |
| <b>215</b> | 9.8*10 <sup>-11</sup>    | 0.292                      | 70                          |
| <b>120</b> | 1.4*10 <sup>-05</sup>    | 0.518                      | 75                          |
| <b>12B</b> | 1.9*10 <sup>-03</sup>    | 0.298                      | 38                          |
| <b>316</b> | 3.4*10 <sup>-09</sup>    | 0.737                      | 93                          |
| <b>193</b> | 4.3*10 <sup>-12</sup>    | 0.655                      | 101                         |
| <b>150</b> | 1.4*10 <sup>-10</sup>    | 0.630                      | 62                          |
| <b>125</b> | 1.5*10 <sup>-05</sup>    | 0.404                      | 58                          |

184

185 The concentrations of protein, triglycerides, glycogen, and glucose were significantly higher in reproductive than  
186 trophic eggs (LMER, protein: t = -13.11, p <0.0001; triglycerides: t = -11.66, p <0.0001; glycogen: t = -11.98,  
187 p <0.0001; glucose: t = -18.60, p <0.0001; Figure 4).



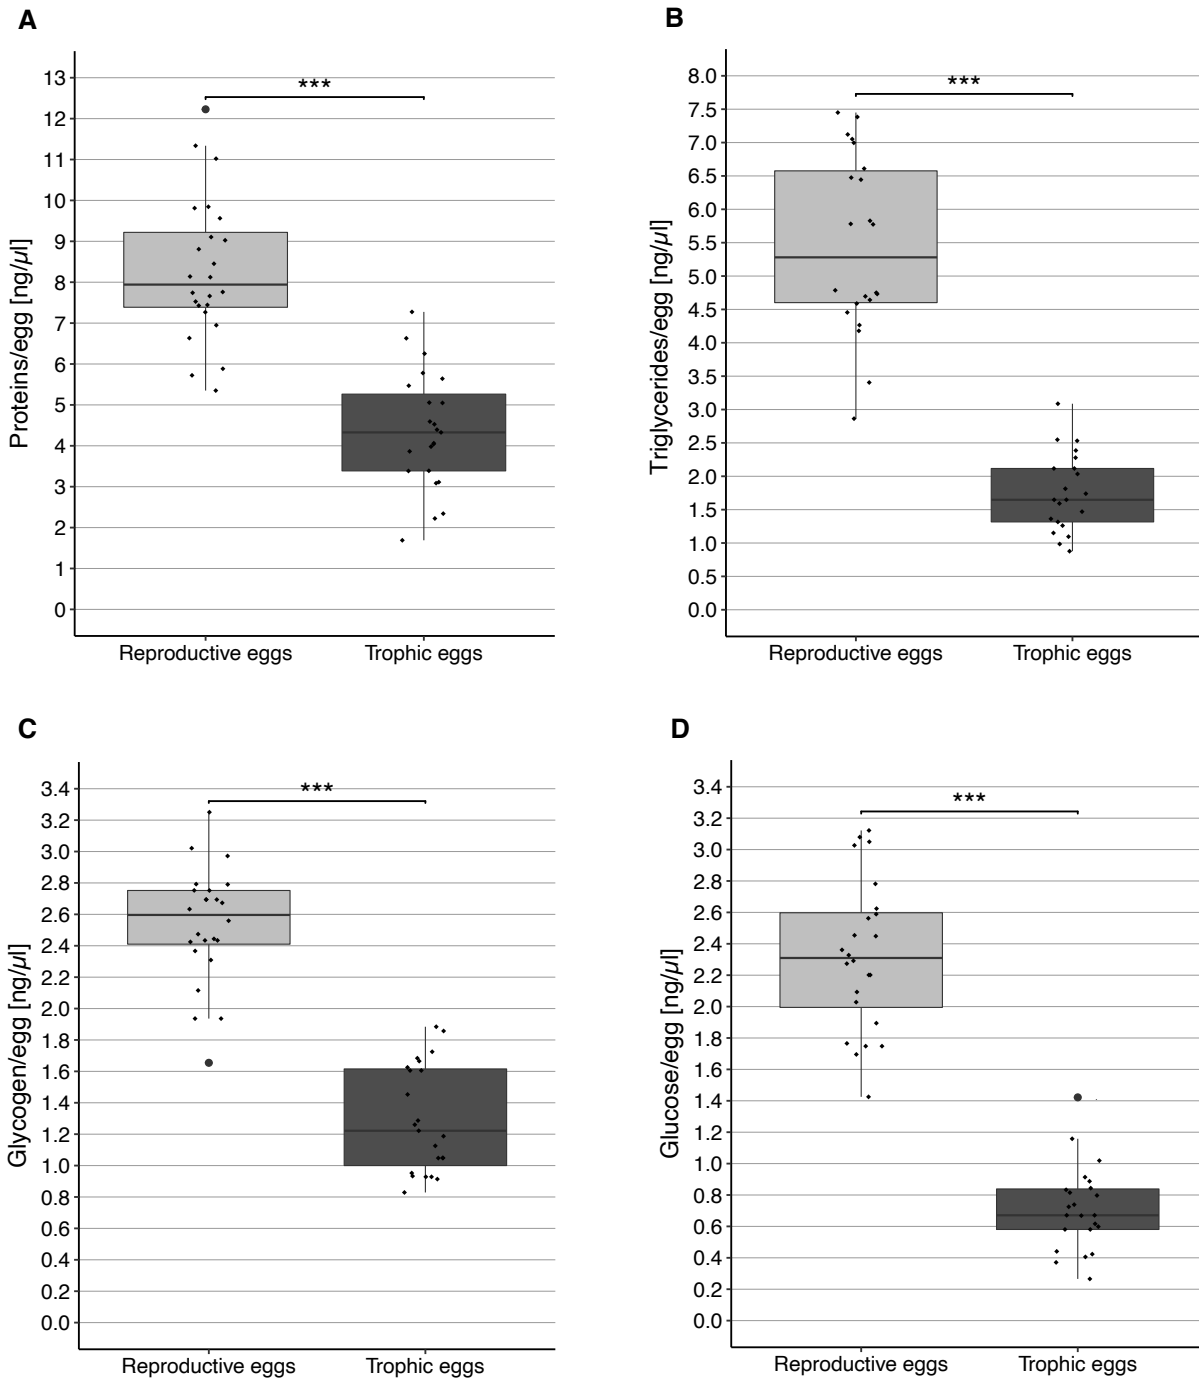

188

189

190 **Figure 4.** Concentration of protein (A), triglycerides (B), glycogen (C) and glucose (D) in reproductive and trophic eggs.  
191 Each dot represents the average of the two replicates per colony.

192 The amount of small RNA (<200 nt, including miRNA and tRNA; Nagano and Fraser 2011) was significantly higher  
193 in reproductive eggs ( $44.3 \pm 1.4$  ng, mean  $\pm$  SE) than in trophic eggs ( $22.3 \pm 1.1$  ng; paired-t-test,  $t_{(23)} = 15.9$ ,  $p =$   
194  $6.5 \cdot 10^{-14}$ ). The same was true for longer RNAs (>200 nt; reproductive eggs:  $7.6 \pm 0.6$  ng, mean  $\pm$  SE; trophic eggs:  
195  $3.6 \pm 0.3$  ng; paired-t-test,  $t_{(23)} = 7.2$ ,  $p = 2.7 \cdot 10^{-7}$ ).

196 The DNA quantification showed that the amount of DNA was about twice higher in reproductive ( $15.9 \pm 1.9 \text{ ng}/\mu\text{l}$ )  
197 than trophic eggs ( $8.8 \pm 1.9 \text{ ng}/\mu\text{l}$ ; t-test,  $t_{(4.7)} = 2.7$ ,  $p = 0.045$ ).

198 There was a significant difference in the miRNA fragment size distribution between reproductive and trophic eggs  
199 (Mantel test,  $r_M = 0.26$ ,  $p < 0.0001$ ), as shown on the PCA (Figure 5A). There was no difference in the tRNA fragment  
200 size distribution between the two types of eggs (Mantel test,  $r_M = 0.01$ ,  $p = 0.30$ , Figure 5B).

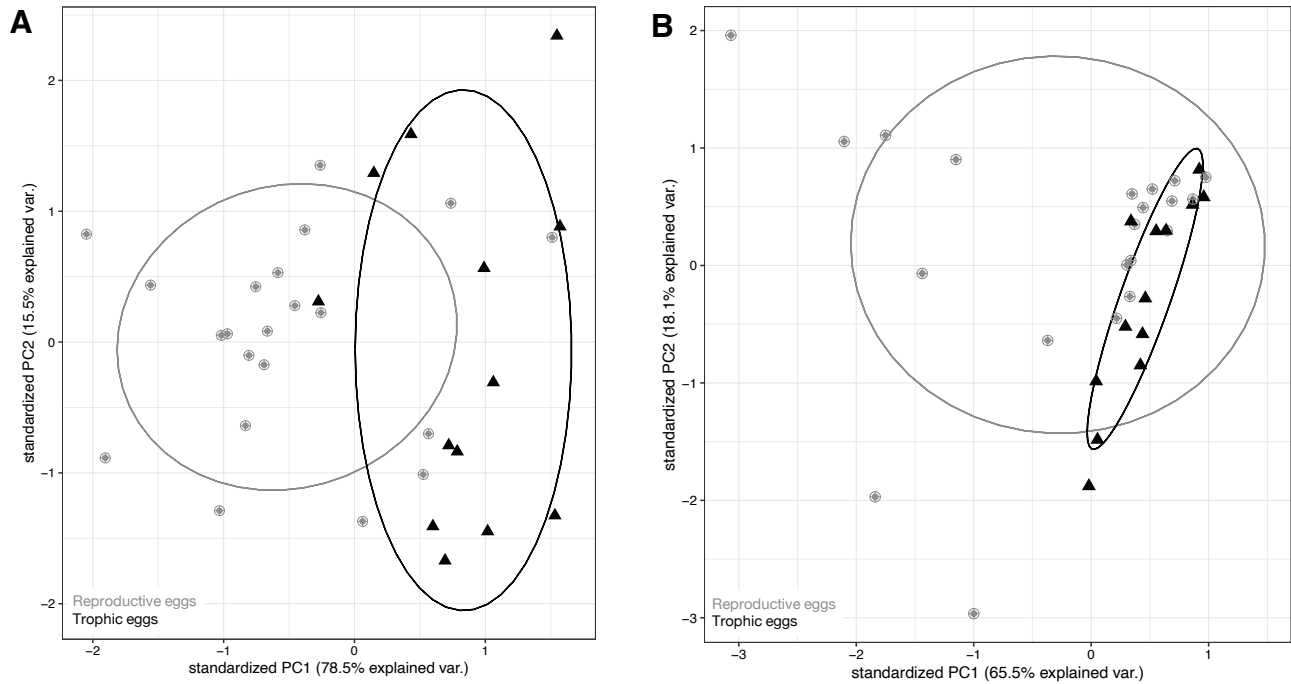

202 **Figure 5.** First two principal components (PC1 and PC2) explaining size distribution variation for (A) miRNA and (B)  
203 tRNA across egg samples, with reproductive eggs in grey and trophic eggs in black. There is a separation of the samples  
204 by egg types for miRNAs, but not for tRNA. Ellipses enclose each of the egg type groups.

## 205 Trophic eggs influence caste fate of larvae

206 The percentage of larvae that developed into queens was significantly lower in recipient colonies that received  
207 trophic eggs ( $27 \pm 9\%$  mean  $\pm$  SE;  $n=22$ ) than in recipient colonies without trophic eggs ( $83 \pm 10\%$ ;  $n=22$ ; binomial  
208 GLMM,  $z = 4.25$ ,  $p = 2 \times 10^{-5}$ ; Figure 6A and Supplementary Table 2). The survival of larvae until the pupal stage  
209 was also significantly lower in the colonies without trophic eggs ( $16.9 \pm 3.8\%$ ;  $n=22$ ; LMER,  $z = 2.66$ ,  $p = 0.008$ )  
210 than in colonies with trophic eggs ( $30.2 \pm 6.7\%$ ; mean  $\pm$  SE;  $n=22$ ), but the 1.8 fold survival decrease cannot fully  
211 account for the 3 fold difference in queen percentage between the two treatments. Furthermore, there was no  
212 significant correlation between larval mortality and the percentage of larvae developing into queens ( $n=44$  recipient  
213 colonies; LMER,  $z = 0.97$ ,  $p = 0.34$ ; Figure 6B). These analyses allow us to exclude differential survival between  
214 castes as an explanation for the higher percentage of queens developing in the recipient colonies without trophic  
215 eggs.

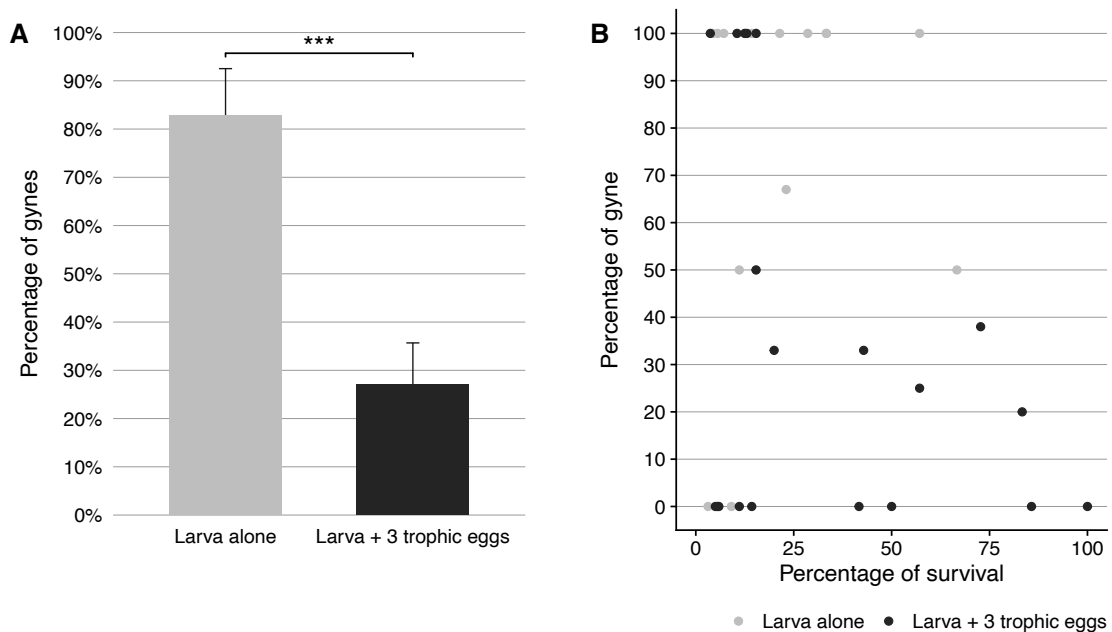

216

217 **Figure 6. (A)** Percentage of larvae which developed into queens in recipient colonies without (grey) or with (black)  
218 trophic eggs. **(B)** Scatterplot of the relationship between the percentage of larvae which developed into queens and the  
219 percentage of survival from larvae to pupae.

220

## 221 Discussion

222 Our study reveals that *P. rugosus* queens lay a very high proportion (0.6) of trophic eggs. These eggs differ in  
223 many ways from reproductive eggs. First, trophic eggs are larger, rounder, have a smoother surface, a more  
224 granular looking content as well as a more fragile chorion than reproductive eggs. Similar differences between  
225 trophic and reproductive eggs have been reported in other ant species (Wilson 1976; Wardlaw and Elmes 1995;  
226 Gobin *et al.* 1998; Dietemann and Peeters 2000; Dietemann *et al.* 2002; Perry and Roitberg 2006; Lee *et al.* 2017).

227 Our analyses also showed that trophic eggs are solely laid by queens; *P. rugosus* workers are able to produce  
228 reproductive eggs which occasionally develop into males, but they do not lay trophic eggs. Moreover, trophic eggs  
229 have a reduced DNA content.

230 Importantly, our experiments showed that the presence of trophic eggs influences the process of caste  
231 determination. First instar female larvae fed with trophic eggs were significantly more likely to develop into workers  
232 than larvae without access to trophic eggs. This was somewhat surprising because trophic eggs are generally  
233 thought to be an important source of nutrients to the colony and, everything else being equal, one would think that  
234 eating such eggs should increase the likelihood of females to develop into queens (which are usually larger than  
235 workers). Indeed, a study in the Argentine ant *Linepithema humile* showed that the presence of queens in colonies  
236 was associated with a drastic decrease in the number of trophic eggs (laid by workers) fed to the larvae as well as  
237 a decrease in the proportion of larvae developing into queens (Bartels 1988). Bartels thus proposed that the  
238 deprivation of trophic eggs may have an inhibitory effect on the probability of larvae to develop into queens (Bartels  
239 1988), but no experiment was performed to show a causal effect of trophic eggs. In some lineages of *P. barbatus*,  
240 the experimental increase of maternal juvenile hormone resulted in a 50% increase in worker body size, as well  
241 as a sharp reduction in total number of progeny reared and a higher proportion of trophic eggs laid by queens  
242 (Helms Cahan *et al.* 2011). This was interpreted as an effect of trophic egg availability or brood/worker ratio on  
243 the nutritional environment. Importantly, in these two studies the consumption of trophic eggs was suggested to  
244 either increase the size of the individuals produced or the likelihood to develop into queens (which are larger than  
245 workers). By contrast, our study reveals that the consumption of trophic eggs reduces the likelihood of developing  
246 into queens.

247 Our analyses revealed that trophic eggs have a lower content of protein, triglycerides, glycogen, and glucose than  
248 reproductive eggs. A reduced protein content of trophic as compared to reproductive eggs has also been  
249 documented in *Pheidole pallidula* (Lorber and Passera 1981). These findings are in line with the view that trophic  
250 eggs do not simply have a nutritive function as it might then be expected that they should at least contain as much  
251 nutrients as reproductive eggs. Interestingly, our analyses also revealed important differences in RNA and miRNA  
252 content between the two egg types. miRNAs have already been suggested to influence larval caste determination  
253 in the honeybee (Guo *et al.* 2013) with worker jelly being enriched in miRNAs compared to royal jelly (Guo *et al.*  
254 2013; Zhu *et al.* 2017). These studies suggest that it is not the royal jelly that stimulates larval differentiation into  
255 queen, but rather the worker jelly which stimulates the development of larva into worker. Similarly, our study  
256 reveals that compounds found in trophic eggs, perhaps miRNAs, influence larval development towards the worker  
257 phenotype. Interestingly, it has also been recently shown that trophallactic fluid in the ant *Camponotus floridanus*  
258 contains non-digestion related proteins, microRNAs and juvenile hormone (LeBoeuf *et al.* 2016). Moreover,  
259 comparison of trophallactic fluid proteins across social insect species revealed that many are regulators of growth,  
260 development and behavioral maturation (Meurville and LeBoeuf 2021). Finally, a recent study showed that pupae  
261 of several ant species produce secretions that play an important role for early larval nutrition with young larvae  
262 exhibiting stunted growth and decreased survival without access to the fluid (Snir *et al.* 2022). This raises the

263 possibility that chemicals delivered in trophic eggs, trophallactic fluids and pupae secretions play previously  
264 unsuspected roles in communication and caste development. Given that some ants do not perform trophallaxis, it  
265 would be interesting to determine whether there are differences in the content of trophic eggs of species performing  
266 trophallaxis and species which do not.

267 Maternal effects on the process of caste determination have been demonstrated in several social insect species,  
268 including *P. rugosus*, either by queen behaviour or content of the eggs being produced (De Menten *et al.* 2005;  
269 Linksvayer 2006; Schwander *et al.* 2008b; Libbrecht *et al.* 2013; Wei *et al.* 2019). This is, to our knowledge the  
270 first experimental demonstrations that provisioning of trophic eggs influences caste fate. Since only queens  
271 produce trophic eggs in *P. rugosus*, trophic egg provisioning could be the main mechanism underlying the  
272 previously documented maternal effects on the process of caste determination. In species where workers produce  
273 trophic eggs (Supplementary Table 1), the same mechanism could allow workers to influence colony level caste  
274 ratios.

275 Finally, our analyses also revealed seasonal differences in the proportion of reproductive and trophic eggs, with a  
276 higher ratio of trophic eggs before hibernation than after. In *Pogonomyrmex* the production of new queens occurs  
277 after hibernation (Smith and Tschinkel 2006) or when the queen dies or is removed from the colony (pers. obs).  
278 Thus, new queens are typically produced when there are fewer trophic eggs. Our results predict that under natural  
279 conditions, a decrease in the proportion of trophic eggs should lead to an increase in the larvae developing into  
280 queens. The same logic applies to species where trophic eggs are laid only by the workers in queenright colonies  
281 (Supplementary Table 1). After the queen's death, workers start producing their own male offspring and lay mostly  
282 (if not only) reproductive eggs (*Temnothorax recedens*, Dejean and Passera 1974; *Plagiolepis pygmaea*, Passera  
283 1980; *Myrmecia gulosa*, Dietemann *et al.* 2002), which again leads to a decrease, or cessation, in trophic egg  
284 production. A decrease in trophic egg production and the development of queens were observed simultaneously  
285 in freshly orphaned colonies of *Temnothorax recedens* (Dejean and Passera 1974), *Plagiolepis pygmaea* (Passera  
286 1980) and *Myrmecia gulosa* (Dietemann *et al.* 2002). These examples are consistent with the view that trophic  
287 eggs may also play a role in the process of caste determination in other ant species.

288 In conclusion, this study provides a new striking example of how females can influence the developmental fate of  
289 their offspring. Because many ants produce trophic eggs, it is possible that this mechanism of parental  
290 manipulation is widespread and play an important role in the general process of caste determination.

## 291 Acknowledgments

292 We thank Dr. C. Berney for technical assistance to develop wet lab protocols. We are grateful to S. McGregor and  
293 Prof. M. Chapuisat for their helpful comments on the manuscript. This work was supported by an ERC grant and  
294 the Swiss NSF (LK).

## 295 References

- 296 Amor, F., P. Ortega, R. Boulay, and X. Cerdá. 2017. Frequent colony orphaning triggers the production of  
297 replacement queens via worker thelytoky in a desert-dwelling ant. *Insectes Soc.* **64**:373–378.  
298 [doi.org/10.1007/s00040-017-0556-9](https://doi.org/10.1007/s00040-017-0556-9)
- 299 Augustin, J. O., J. F. Santos, and S. L. Elliot. 2011. A behavioral repertoire of *Atta sexdens* (Hymenoptera,  
300 Formicidae) queens during the claustral founding and ergonomic stages. *Insectes Soc.* **58**:197–206.  
301 [doi.org/10.1007/s00040-010-0137-7](https://doi.org/10.1007/s00040-010-0137-7)
- 302 Azevedo, D. O., J. C. Zanuncio, J. H. C. Delabie, and J. E. Serrão. 2011. Temporal variation of vitellogenin  
303 synthesis in *Ectatomma tuberculatum* (Formicidae: Ectatomminae) workers. *J. Insect Physiol.* **57**:972–977.  
304 [doi.org/10.1016/j.jinsphys.2011.04.015](https://doi.org/10.1016/j.jinsphys.2011.04.015)
- 305 Baroni Urbani, C. B. 1991. Indiscriminate oophagy by ant larvae: an explanation for brood serial organization?  
306 *Insectes Soc.* **38**:229–239. [doi.org/10.1007/BF01314909](https://doi.org/10.1007/BF01314909)
- 307 Bartels, P. J. 1988. Reproductive caste inhibition by Argentine ant queens: New mechanisms of queen control.  
308 *Insectes Soc.* **35**:70–81. [doi.org/10.1007/BF02224139](https://doi.org/10.1007/BF02224139)
- 309 Bates, D., M. Maechler, B. Bolker, and S. Walker. 2015. Fitting Linear Mixed-Effects Models Using lme4. *J. Stat.*  
310 *Softw.* **67**:1–48. [doi.org/doi:10.18637/jss.v067.i01](https://doi.org/10.18637/jss.v067.i01)
- 311 Blake, J. A., and P. L. Arnofsky. 1999. Reproduction and larval development of the spioniform Polychaeta with  
312 application to systematics and phylogeny. *Hydrobiologia.* **402**:57-106. [doi.org/10.1023/A](https://doi.org/10.1023/A)
- 313 Bradford, M. M. 1976. A rapid and sensitive method for the quantification of microgram quantities of protein utilizing  
314 the principle of protein–dye binding. *Anal. Biochem.* **72**:248–254. [doi.org/10.1016/0003-2697\(76\)90527-3](https://doi.org/10.1016/0003-2697(76)90527-3)
- 315 Brian, M. V, Rigby, C. 1978. The Trophic Eggs of *Myrmica Rubra* L. *Insect Molecular Biology.* **25**(1):89-110.
- 316 CamargoMathias, M., and F. Caetano. 1995. Trophic eggs in workers of *Neoponera villosa* ants  
317 (Hymenoptera:Ponerinae). *J. Adv. Zool.* **16**:62–66.
- 318 Cameron, R. C., E. J. Duncan, and P. K. Dearden. 2013. Biased gene expression in early honeybee larval  
319 development. *BMC Genomics.* **14**:1–12. BioMed Central. [doi.org/10.1186/1471-2164-14-903](https://doi.org/10.1186/1471-2164-14-903)
- 320 Cassill, D. 2002. Brood care strategies by newly mated monogyne *Solenopsis invicta* (Hymenoptera: Formicidae)  
321 queens during colony founding. *Ann. Entomol. Soc. Am.* **95**:208–212. [doi.org/10.1603/0013-  
322 8746\(2002\)095\[0208:BCSBNM\]2.0.CO;2](https://doi.org/10.1603/0013-8746(2002)095[0208:BCSBNM]2.0.CO;2)
- 323 Choe, J. C. 1988. Worker reproduction and social evolution in ants (Hymenoptera: Formicidae). *Advances in*  
324 *myrmecology.* 163-187
- 325 Collin, R. 2004. Phylogenetic effects, the loss of complex characters, and the evolution of development in  
326 calyptraeid gastropods. *Evolution.* **58**:1488–1502. [doi.org/10.1111/j.0014-3820.2004.tb01729.x](https://doi.org/10.1111/j.0014-3820.2004.tb01729.x)
- 327 Collins, D. H., I. Mohorianu, M. Beckers, V. Moulton, T. Dalmay, and Bourke A. F. 2017. MicroRNAs Associated  
328 with Caste Determination and Differentiation in a Primitively Eusocial Insect. *Sci. Rep.* **7**:1–9. Nature  
329 Publishing Group. [doi.org/10.1038/srep45674](https://doi.org/10.1038/srep45674)
- 330 Crespi, B. J. 1977. Cannibalism and trophic eggs in subsocial and eusocial insects. Pp. 176–213 in M. A. Elgar  
331 and B. J. Crespi, eds. *Cannibalism: Ecology and Evolution Among Diverse Taxa.*

- 332 Dejean, A., and L. Passera. 1974. Ponte des ouvrières et inhibition royale chez la Fourmi *Temnothorax recedens*  
333 (Nyl.) (Formicidae, Myrmicinae). *Insectes Soc.* **21**:343–355. doi.org/10.1007/BF02331564
- 334 Della Lucia, T. M. C., E. F. Vilela, D. D. O. Moreira, J. M. S. Bento, and N. Dos Anjos. 1990. Egg-laying in *Atta*  
335 *sexdens rubropilosa*, under laboratory conditions. Pp. 173–179 in R. K. Vander Meer, K. Jaffé, and A.  
336 Cedeno, eds. Applied Myrmecology: A World Perspective. Westview Press, New York.
- 337 Dietemann, V., B. Hölldobler, and C. Peeters. 2002. Caste specialization and differentiation in reproductive  
338 potential in the phylogenetically primitive ant *Myrmecia gulosa*. *Insectes Soc.* **49**:289–298.  
339 doi.org/10.1007/s00040-002-8316-9
- 340 Dietemann, V., and C. Peeters. 2000. Queen influence on the shift from trophic to reproductive eggs laid by  
341 workers of the ponerine ant *Pachycondyla apicalis*. *Insectes Soc.* **47**:223–228.  
342 doi.org/10.1007/PL00001707
- 343 Dijkstra, M. B., D. R. Nash, and J. J. Boomsma. 2005. Self-restraint and sterility in workers of *Acromyrmex* and  
344 *Atta* leafcutter ants. *Insectes Soc.* **52**:67–76. doi.org/10.1007/s00040-004-0775-8
- 345 Fletcher, D. J. C., and K. G. Ross. 1985. Regulation of reproduction in Eusocial hymenoptera. *Annu. Rev. Entomol.*  
346 **30**:319–343.
- 347 Freeland, J. 1958. Biological and social patterns in the Australian bulldog ants of the genus *Myrmecia*. *Aust. J.*  
348 *Zool.* **6**:1–18. doi.org/https://doi.org/10.1071/ZO9580001
- 349 Gibson, G., C. Hart, C. Coulter, and H. Xu. 2012. Nurse eggs form through an active process of apoptosis in the  
350 spionid *Polydora cornuta* (Annelida). *Integr. Comp. Biol.* **52**:151–160. doi.org/10.1093/icb/ics054
- 351 Gobin, B., J. Billen, and C. Peeters. 1999. Policing behaviour towards virgin egg layers in a polygynous ponerine  
352 ant. *Anim. Behav.* **58**:1117–1122. doi.org/10.1006/anbe.1999.1245
- 353 Gobin, B., and F. Ito. 2000. Queens and major workers of *Acanthomyrmex ferox* redistribute nutrients with trophic  
354 eggs. *Naturwissenschaften* **87**:323–326. doi.org/10.1007/s001140050731
- 355 Gobin, B., C. Peeters, and J. Billen. 1998. Production of trophic eggs by virgin workers in the ponerine ant  
356 *Gnamptogenys menadensis*. *Physiol. Entomol.* **23**:329–336. doi.org/10.1046/j.1365-3032.1998.00102.x
- 357 Guo, X., S. Su, G. Skogerboe, S. Dai, W. Li, Z. Li, F. Liu, R. Ni, Y. Guo, S. Chen, S. Zhang, and R. Chen. 2013.  
358 Recipe for a busy bee: MicroRNAs in honey bee caste determination. *PLoS One* **8**:1–10.  
359 doi.org/10.1371/journal.pone.0081661
- 360 Haskins, C.P., and Whelden R.M. 1965. “Queenlessness,” Worker Sibship, and Colony Versus Population  
361 Structure in the Formicid Genus *Rhytidoponera*. *Psyche: A Journal of Entomology*. **72**(ID 040465): 26  
362 pages. doi.org/10.1155/1965/40465
- 363 Heinze, J., S. Cover, and B. Hölldobler. 1995. Neither worker, nor queen: an ant caste specialized in the production  
364 of unfertilized eggs. *Psyche A J. Entomol.* **102**:173–185. doi.org/10.1155/1995/65249
- 365 Heinze, J., S. Foitzik, B. Oberstadt, O. Ruppell, and B. Hölldobler. 1999. A female caste specialized for the  
366 production of unfertilized eggs in the ant *Crematogaster smithi*. *Naturwissenschaften*. **86**:93–95.  
367 doi.org/10.1007/s001140050579
- 368 Helms Cahan, S., C. J. Graves, and C. S. Brent. 2011. Intergenerational effect of juvenile hormone on offspring in  
369 *Pogonomyrmex harvester* ants. *J. Comp. Physiol. B.* **181**:991–999. doi.org/10.1007/s00360-011-0587-x

- 370 Hölldobler, B., and N. F. Carlin. 1989. Colony founding, queen control and worker reproduction in the ant  
371 *Aphaenogaster (=Novomessor) cockerelli* (Hymenoptera: Formicidae). *Psyche (Stuttg)*. **96**:131–152.
- 372 Hölldobler, B., and E. O. Wilson. 1983. Queen Control in Colonies of Weaver Ants (Hymenoptera: Formicidae).  
373 *Ann. Entomol. Soc. Am.* **76**:235–238. doi.org/10.1093/aesa/76.2.235
- 374 Hora, R. R., C. Poteaux, C. Doums, D. Fresneau, and R. Féneron. 2007. Egg cannibalism in a facultative  
375 polygynous ant: Conflict for reproduction or strategy to survive? *Ethology*. **113**:909-916.  
376 doi.org/10.1111/j.1439-0310.2007.01391.x
- 377 Hung, A. C. F. 1973. Reproductive biology in dulotic ants: preliminary report (Hymenoptera: Formicidae). *Entomol.*  
378 *News*. **84**:253–259.
- 379 Ito, F. 1991. Preliminary report on queenless reproduction in a primitive ponerine ant *Amblyopone sp.* (reclinata  
380 group) in west Java, indonesia. *Psyche (Stuttg)*. **98**:319–322.
- 381 Ito, F. 1993. Social organization in a primitive ponerine ant: Queenless reproduction, dominance hierarchy and  
382 functional polygyny in *Amblyopone sp.* (reclinata group) (hymenoptera: Formicidae: Ponerinae). *J. Nat. Hist.*  
383 **27**:1315–1324. doi.org/10.1080/00222939300770751
- 384 Ito, F. 2005. Mechanisms regulating functional monogyny in a Japanese population of *Leptothorax acervorum*  
385 (Hymenoptera, Formicidae): Dominance hierarchy and preferential egg cannibalism. *Belgian J. Zool.* **135**:3-  
386 8.
- 387 Khila, A., and E. Abouheif. 2008. Reproductive constraint is a developmental mechanism that maintains social  
388 harmony in advanced ant societies. *Proc. Natl. Acad. Sci. U.S.A.* **105**:17884-17889.  
389 doi.org/10.1073/pnas.0807351105
- 390 Khila, A., and E. Abouheif. 2010. Evaluating the role of reproductive constraints in ant social evolution. *Philos.*  
391 *Trans. R. Soc. B.* **365**:617–630. doi.org/10.1098/rstb.2009.0257
- 392 Klowden, M. J. 2013. Developmental Systems. Pp. 149–196 in M. J. Klowden, ed. *Physiological Systems in Insects*  
393 (Third Edition). Academic Press.
- 394 Kudo, S., and T. Nakahira. 2004. Effects of Trophic-Eggs on Offspring Performance and Rivalry in a Sub-Social  
395 Bug. *Oikos*. **107**:28–35.
- 396 LeBoeuf, A. C., P. Waridel, C. S. Brent, A. N. Gonçalves, L. Menin, D. Ortiz, O. Riba-Grognuz, A. Koto, Z. G.  
397 Soares, E. Privman, E. A. Miska, R. Benton, and L. Keller. 2016. Oral transfer of chemical cues, growth  
398 proteins and hormones in social insects. *Elife*. **5**:e20375:1-27. doi.org/10.7554/eLife.20375
- 399 Lee, C. C., H. Nakao, S. P. Tseng, H. W. Hsu, G. L. Lin, J. W. Tay, J. Billen, F. Ito, C. Y. Lee, C. C. Lin, and C. C.  
400 S. Yang. 2017. Worker reproduction of the invasive yellow crazy ant *Anoplolepis gracilipes*. *Front. Zool.*  
401 **14**(1):1-12. doi.org/10.1186/s12983-017-0210-4
- 402 Levin, L. A., and T. S. Bridges. 1995. Pattern and diversity in reproduction and development. Pp. 1–48 in L.  
403 McEdward, ed. *Ecology of marine invertebrate larvae*. CRC Press. doi.org/10.1201/9780138758950-1
- 404 Libbrecht, R., M. Corona, F. Wende, D. O. Azevedo, J. E. Serrão, and L. Keller. 2013. Interplay between insulin  
405 signaling, juvenile hormone, and vitellogenin regulates maternal effects on polyphenism in ants. *Proc. Natl.*  
406 *Acad. Sci. U.S.A.* **110**:11050–11055. doi.org/10.1073/pnas.1221781110



- 407 Linksvayer, T.A. 2006. Direct, Maternal, and Sibsocial Genetic Effects on Individual and Colony Traits in an Ant.  
408 *Evolution*. **60**(12): 2552. doi.org/10.1554/06-011.1
- 409 López-Ortega, M., and T. Williams. 2018. Natural enemy defense, provisioning and oviposition site selection as  
410 maternal strategies to enhance offspring survival in a sub-social bug. *PLoS One* **13**:1–18.  
411 doi.org/10.1371/journal.pone.0195665
- 412 Lorber, B., and L. Passera. 1981. Étude comparative des protéines solubles des œufs de la fourmi *Pheidole*  
413 *pallidula* Nyl. Bull Intérieur SF-UIEIS 97–99.
- 414 Masuko, K. 2003. Larval oophagy in the ant *Amblyopone silvestrii* (Hymenoptera, Formicidae). *Insectes Soc.*  
415 **50**:317–322. doi.org/10.1007/s00040-003-0688-y
- 416 De Menten, L., Fournier, D., Brent, C., Passera, L., Vargo, E.L., and Aron. S. 2005. Dual Mechanism of Queen  
417 Influence over Sex Ratio in the Ant *Pheidole Pallidula*. *Behavioral Ecology and Sociobiology*. **58**(6): 527-33.  
418 doi.org/10.1007/s00265-005-0964-0.
- 419 Meurville, M.-P., and LeBoeuf, A.C. 2021. Trophallaxis: The Functions and Evolution of Social Fluid Exchange in  
420 Ant Colonies (Hymenoptera: Formicidae). *Myrmecological News*. **31**:1-20. doi.org/doi:  
421 10.25849/myrmecol.news\_031:001 13
- 422 Nagano, T., and Fraser, P. 2011. No-Nonsense Functions for Long Noncoding RNAs. *Cell* **145**:178-181.  
423 doi.org/10.1016/J.CELL.2011.03.014
- 424 Passera, L. 1978. Une nouvelle catégorie d'œufs alimentaires: les œufs alimentaires émis par les reines vierges  
425 de *Pheidole pallidula* (Nyl.) (Formicidae, Myrmicinae). *Insectes Soc.* **25**:117–126.
- 426 Passera, L. 1980. La fonction inhibitrice des reines de la fourmi *Plagiolepis pygmaea* Latr.: Rôle des phéromones.  
427 *Insectes Soc.* **27**:212–225. doi.org/10.1007/BF02223665
- 428 Peeters, C. 2017. Independent colony foundation in *Paraponera clavata* (hymenoptera: Formicidae): First workers  
429 lay trophic eggs to feed queen's larvae. *Sociobiology* **64**:417–422.  
430 doi.org/10.13102/sociobiology.v64i4.2092
- 431 Perry, J. C., and B. D. Roitberg. 2006. Trophic egg laying: Hypotheses and tests. *Oikos* **112**:706–714.  
432 doi.org/10.1111/j.0030-1299.2006.14498.x
- 433 Romiguer, J., Borowiec, M. L., Weyna, A., Helleu, Q., Loire, E., La Mendola, C., Rabeling, C., Fisher, B. L., Ward,  
434 P. S., Keller, L. 2022. Ant phylogenomics reveals a natural selection hotspot preceding the origin of complex  
435 eusociality. *Current Biology* **32**(13):2942-2947.e4. doi.org/10.1016/j.cub.2022.05.001
- 436 RStudio Team. 2015. RStudio: Integrated Development Environment for R. Boston, MA.
- 437 Schwander, T., J. Y. Humbert, C. S. Brent, S. H. Cahan, L. Chapuis, E. Renai, and L. Keller. 2008. Maternal Effect  
438 on Female Caste Determination in a Social Insect. *Curr. Biol.* **18**:265–269.  
439 doi.org/10.1016/j.cub.2008.01.024
- 440 Smeeton, L. 1981. The Source of Males in *Myrmica Rubra* L. (Hym. Formicidae). *Insectes Sociaux*. **28**(3):263-78.  
441 doi.org/10.1007/BF02223628.
- 442 Smith, A. A., B. Hölldobler, and J. Liebig. 2008. Hydrocarbon signals explain the pattern of worker and egg policing  
443 in the ant *Aphaenogaster cockerelli*. *J. Chem. Ecol.* **34**:1275–1282. doi.org/10.1007/s10886-008-9529-9

- 444 Smith, C. R., C. Schoenick, K. E. Anderson, J. Gadau, and A. V Suarez. 2007. Potential and realized reproduction  
445 by different worker castes in queen-less and queen-right colonies of *Pogonomyrmex badius*. *Insect. Soc.*  
446 **54**:260-267. doi.org/10.1007/s00040-007-0940-y
- 447 Smith, C. R., and W. R. Tschinkel. 2006. The sociometry and sociogenesis of reproduction in the Florida harvester  
448 ant, *Pogonomyrmex badius*. *J. Insect Sci.* **6**:1–11. doi.org/10.1673/2006\_06\_32.1
- 449 Snir, O., Alwaseem, H., Heissel, S. Sharma, A., Valdés-Rodríguez, S., Carroll, T.S., Jiang, C.S., Razzauti, J.,  
450 Kronauer, D.J.C. 2022. The pupal moulting fluid has evolved social functions in ants. *Nature*.  
451 **612**(7940):488-494. doi.org/10.1038/s41586-022-05480-9
- 452 Sohel, M. H. 2016. Extracellular/Circulating MicroRNAs: Release Mechanisms, Functions and Challenges. *Achiev.*  
453 *Life Sci.* **10**:175–186. doi.org/10.1016/j.als.2016.11.007
- 454 Søvik, E., G. Bloch, and Y. Ben-Shahar. 2015. Function and evolution of microRNAs in eusocial Hymenoptera.  
455 *Front. Genet.* **6**:1–11. doi.org/10.3389/fgene.2015.00193
- 456 Strathmann, M. F., and R. R. Strathmann. 2006. A vermetid gastropod with complex intracapsular cannibalism of  
457 nurse eggs and sibling larvae and a high potential for invasion. *Pacific Sci.* **60**:97–108.  
458 doi.org/10.1353/psc.2005.0062
- 459 Suzzoni, J. P., L. Passera, and A. Strambi. 1979. Taux des ecdystéroïdes et déterminisme des castes de la Fourmi  
460 *Pheidole pallidula* (Hym. Formicidae).
- 461 Taylor, R.W. 1978. *Nothomyrmecia Macrops*: A Living-Fossil Ant Rediscovered. *Science.* **201**(4360):979-85.  
462 doi.org/10.1126/science.201.4360.979
- 463 Tennessen, J. aso. M., W. E. Barry, J. Cox, and C. S. Thummel. 2014. Methods for studying metabolism in  
464 *Drosophila*. *Methods* **68**:105–115. doi.org/10.1016/j.ymeth.2014.02.034
- 465 Torossian, C. 1968. Recherches Sur La Biologie et l'éthologie De *Dolichoderus Quadripunctatus* (L) (Hym. Form.  
466 Dolichoderidæ). *Insectes Sociaux.* **15**(4):375-88
- 467 Volny, V. P., M. J. Greene, D. M. Gordon, V. P. Volny, M. J. Greene, and D. M. Gordon. 2006. Brood Production  
468 and Lineage Discrimination in the Red Harvester Ant (*Pogonomyrmex barbatus*). *Ecology.* **87**:2194–2200.
- 469 Voss, S. H., J. F. McDonald, and C. H. Keith. 1988. Production and abortive development of fire ant trophic eggs.  
470 *Advances in myrmecology*. Pp. 517-534. ed. J. C. Trager. New York : E. J. Brill.
- 471 Wardlaw, J. C., and G. W. Elmes. 1995. Trophic eggs laid by fertile *Myrmica* queens (Hymenoptera: Formicidae).  
472 *Insectes Soc.* **42**:303–308. doi.org/10.1007/BF0124042
- 473 Wardlaw, J. C., and G. W. Elmes. 1998. Variability in oviposition by workers of six species of *Myrmica*  
474 (hymenoptera, formicidae). *Insectes Soc.* **45**:369–384. doi.org/10.1007/s000400050096
- 475 Wei, H., He, X.J., Liao, C.H., Wu, X.B., Jiang, W.J., Zhang, B., Zhou, L.B., Zhang, L.Z., Barron, A.B., Zeng, Z.J.  
476 2019. A Maternal Effect on Queen Production in Honeybees. *Current Biology.* **29**(13):2208-2213.e3.  
477 doi.org/10.1016/j.cub.2019.05.059.
- 478 Wheeler, W. M. 1910. *Ants: Their Structure, Development, and Behavior*. The Columbia University Press, New  
479 York. doi.org/10.1155/1922/80849
- 480 Wilson, E. O. 1976. A social ethogram of the neotropical arboreal ant *Zacryptocerus varians* (Fr. Smith). *Anim.*  
481 *Behav.* **24**:354–363. doi.org/10.1016/S0003-3472(76)80043-7

- 482 Yamada, A., F. Ito, R. Hashim, and K. Eguchi. 2018. Queen polymorphism in *Acanthomyrmex careoscribis*  
483 Moffett, 1986 in Peninsular Malaysia (Hymenoptera: Formicidae: Myrmicinae), with descriptions of hitherto  
484 unknown female castes and males. *Asian Myrmecology*. **10**(e010009):1-19. doi.org/10.20362/am.010009
- 485 Yamauchi, K., T. Furukawa, K. Kinomura, H. Takamine, and K. Tsuji. 1991. Secondary Polygyny by Inbred  
486 Wingless Sexuals in the Dolichoderine Ant *Technomyrmex albipes*. *Behav. Ecol. Sociobiol.* **29**:313–319.
- 487 Zhu, K., M. Liu, Z. Fu, Z. Zhou, Y. Kong, H. Liang, Z. Lin, J. Luo, H. Zheng, P. Wan, J. Zhang, K. Zen, J. Chen, F.  
488 Hu, C. Y. Zhang, J. Ren, and X. Chen. 2017. Plant microRNAs in larval food regulate honeybee caste  
489 development. *PLoS Genet.* **13**:1–23. doi.org/10.1371/journal.pgen.1006946
